# Supplementary material for: Template-free synthesis of three dimensional porous boron nitride nanosheets for efficient water cleaning
Source: Royal Society of Chemistry journal article supplement (doi:10.1039/c8ra06445h), 2018-01-01
Supplement: c8ra06445h1.pdf [file c8ra06445h1.pdf]

Electronic supplementary information

## Template-free synthesis of three dimensional porous boron nitride nanosheets for efficient water cleaning

Jie Li<sup>1,2,\*</sup>, Shi He<sup>1</sup>, Rui Li<sup>1,2</sup>, Wei Dai<sup>1,2</sup>, Junhui Tao<sup>1,2</sup>, Chuanhui Wang<sup>1,2</sup>, Junyi Liu<sup>2</sup>,  
Tian Wu<sup>1,2,\*</sup>, Chengchun Tang<sup>3</sup>

<sup>1</sup> School of Physics and Mechanical & Electrical Engineering, Institute for Functional Materials, Hubei University of Education, Wuhan 430205, P.R. China

<sup>2</sup> Institute of materials research and engineering, Hubei University of Education, Wuhan 430205, P.R. China

<sup>3</sup> School of Materials Science and Engineering, Hebei University of Technology, Tianjin 300130, P. R. China

\*Corresponding author. Tel.: +86-27-87943673; fax: +86-27-87943673

E-mail address: lijie@hue.edu.cn (J. Li); twu@whu.edu.cn (T. Wu)

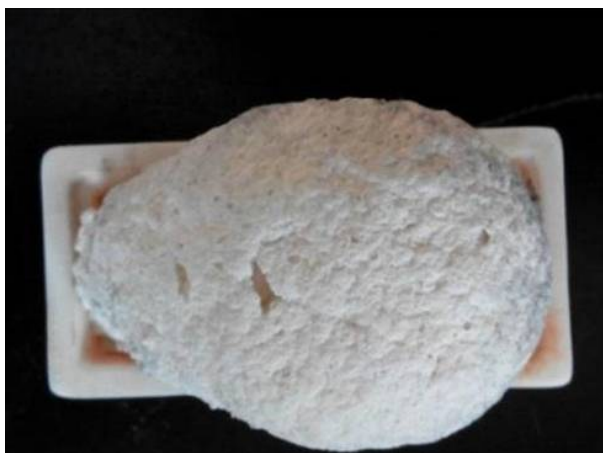

**Fig. S1** The photo of the obtained 3D porous BNNSs.

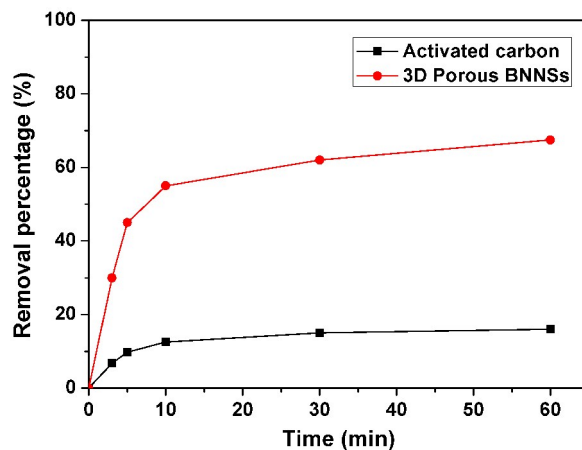

**Fig. S2** Effect of contact time on adsorption of MB on the activated carbon and the 3D porous BNNSs reported previously (mass of adsorbent: 50 mg, solution pH: 8, dye concentration: 100 mg L<sup>-1</sup>, adsorption temperature: 30 °C).

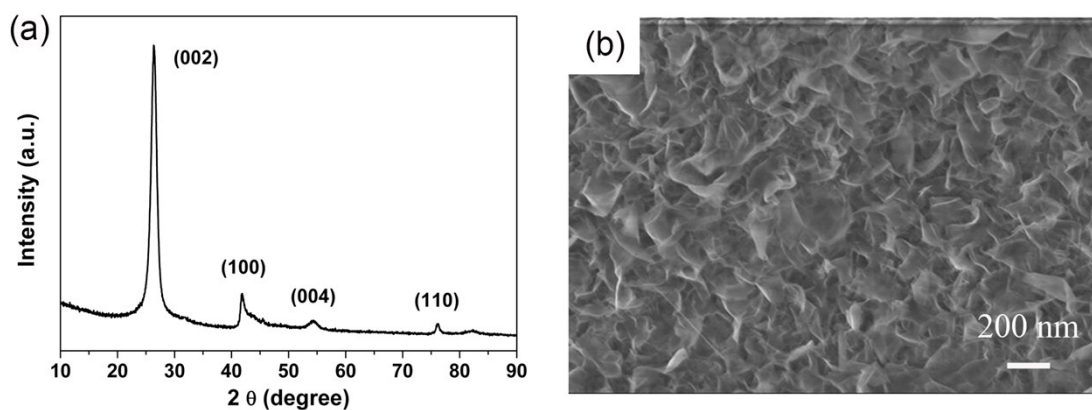

**Fig. S3** (a) Powder XRD pattern of the regenerated 3D porous BNNSs. (b) The corresponding SEM image.

**Table S1.** adsorption capabilities of some reported BN materials for organic dyes.

| Adsorbents        | maximum capacity (mg/g) | Ref       |
|-------------------|-------------------------|-----------|
| porous BNNSs      | 313                     | 14        |
| BN nanocarpet     | 272.4                   | 16        |
| Activated BN      | 392.2                   | 17        |
| 3D BNNSs foam     | 497                     | 20        |
| BN hollow spheres | 191.7                   | 37        |
| 3D porous BNNSs   | <b>413.3</b>            | this work |

**Equation S1.**

$$V_{liq} = \frac{P_a V_{ads} V_m}{RT}$$

In which  $P_a$  and  $T$  are ambient pressure and temperature, respectively, and  $V_m$  is the molar volume of the liquid adsorbate.
